# Supplementary material
Source: ML conference proceedings conference paper supplement (https://proceedings.neurips.cc/paper_files/paper/2013/hash/705f2172834666788607efbfca35afb3-Abstract.html)
Supplement: Supplementary file 3 [file 705f2172834666788607efbfca35afb3-Supplemental.zip]

Archive with 3 entries (2 files):
- nipsSavin2012SupplementaryINfo.pdf
- __MACOSX/
- __MACOSX/._nipsSavin2012SupplementaryINfo.pdf
